## P1422

## Low incidence of major procedure-related adverse events of cryoballoon ablation in real practice: an interim analysis of the Russian national prospective cryoablation registry

Lubimceva T.<sup>1</sup>; Topchyan A.<sup>2</sup>; Davtyan K.<sup>2</sup>; Poleschenko YA.<sup>3</sup>; Artiykhina E.<sup>4</sup>; Tarasiyk E.<sup>5</sup>; Kosonogov A.<sup>6</sup>; Kryzhanovsky D.<sup>7</sup>; Korolev S.<sup>8</sup>; Kolunin G.<sup>9</sup>; Sagitov I.<sup>10</sup>; Nechepurenko A.<sup>11</sup>; Gasimova N.<sup>1</sup>; Mikhaylov E.<sup>1</sup>; Lebedev D.<sup>1</sup>

<sup>1</sup>Almazov National Medical Research Centre, Saint Petersburg, Russian Federation

<sup>2</sup>National Research Center for Preventive Medicine, Moscow, Russian Federation

<sup>3</sup>Saint Petersburg Pavlov State Medical University, Saint Petersburg, Russian Federation

<sup>4</sup>AV Vishnevsky Institute of Surgery, Moscow, Russian Federation

<sup>5</sup>Amur State Medical Academy, Blagoveshchensk, Russian Federation

<sup>6</sup>City Clinical Hospital 5, Nizhny Novgorod, Russian Federation

<sup>7</sup>26 Hospital, Saint Petersburg, Russian Federation

<sup>8</sup>State Clinical Hospital ? 86 FMBA, Moscow, Russian Federation

<sup>9</sup>Tyumen Cardiology Research Center, Tyumen, Russian Federation

<sup>10</sup>Republican Cardiology Clinic, Ufa, Russian Federation

<sup>11</sup>Federal Center of Cardiovascular Surgery, Astrakhan, Russian Federation

**OnBehalf:** On Behalf Of the National Cryoballoon Registry Investigators

### Background

Cryoballoon ablation (CBA) is an effective strategy for atrial fibrillation (AF) management. The Russian Cryoballoon Atrial Fibrillation Ablation Registry (NCT03040037) is a prospective observational multicenter national registry that aims to provide real-world efficacy, safety and outcomes of this technology.

### Methods

A specialized Web-based registry platform was developed for prospective data entry. The platform consists of 8 sections: AF ablation clinic experience and operator experience, patient characteristics, CBA procedure characteristics, periprocedural patient management (including drug therapy), 12-months follow-up with scheduled and unscheduled visits, redo procedure characteristics, early and late procedure-related complications. Patient inclusion criteria were the following: indications for AF catheter ablation, planned CBA, a signed informed consent.

### Results

To date thirty-one clinics have joined the Registry, and 830 patients (477 males, a mean age  $65.4 \pm 11.3$  years) were included. The mean BMI was  $33.2 \pm 3.3$  kg/m<sup>2</sup>. Paroxysmal AF was presented in 688 pts, persistent AF – 111 pts, long standing persistent AF – 31 pts. The main underlying diseases were hypertension (75%), coronary artery disease (11%), chronic heart failure (25%); less commonly - hypertrophic cardiomyopathy (1.4%) and dilated cardiomyopathy (0.7%). The mean LA diameter was  $45.4 \pm 10.2$  mm, and LVEF was  $65.4 \pm 12.6$ %.

**Periprocedural anticoagulant therapy included:** uninterrupted NOACs (313 pts), bridge anticoagulation (327 pts), uninterrupted warfarin (45 pts), anticoagulation initiated only after CBA (32 pts). The mean temperature of cryoablation was  $-44.6 \pm 16.3$  C. Transesophageal echo-guided CBA was performed in 92 cases, intracardiac echocardiography-guided - in 465 cases. There were 5 (0.6%) cases of hemopericardium, and pericardiocentesis was required in 1 (0.1%) case only. Periprocedural TIA was diagnosed in 1 (0.1%) patient with bridge anticoagulation, no stroke occurred. Transient phrenic nerve injury was detected in 18 (2.1%) patients, persistent palsy – in 1 (0.1%) patient. Two cases of esophageal injury were reported, no surgery was required and healing was reported in both patients. The data collection is ongoing.

**Conclusion:** We report early results of the ongoing national CBA Registry. There was a low number of major procedure-related adverse events in real clinical practice among centers with different AF ablation experience. Long-term follow up of the included patients will be reported in the future.

Abstract Figure. Antithrombotic therapy and CBA

### Antithrombotic therapy

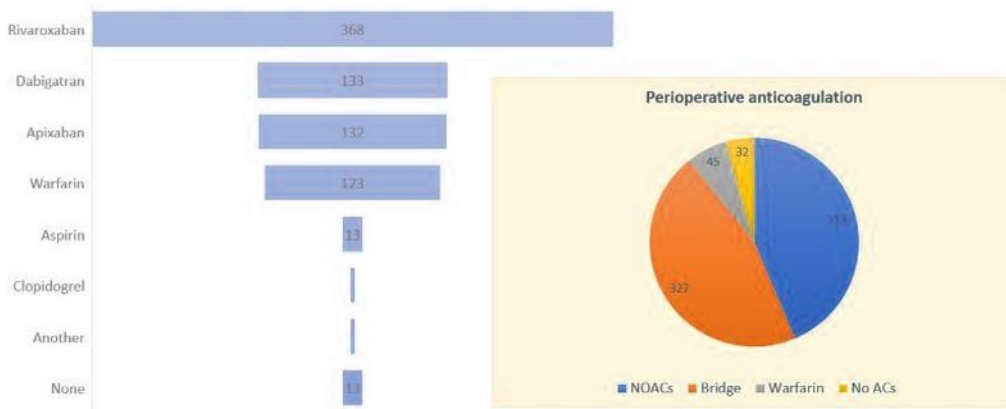

Source: http://academic.oup.com/europace/article-pdf/22/Supplement_1/euaa162.329/33401553/euaa162.329.pdf
